# Supplementary material for: Proton conductivity in multi-component ABO4-type oxides
Source: Royal Society of Chemistry journal article supplement (doi:10.1039/d3cp01741a), 2023-01-01
Supplement: d3cp01741a1.pdf [file d3cp01741a1.pdf]

### Supplementary materials

#### Proton Conductivity in Multi-component ABO<sub>4</sub>-type Oxides

Ashraf A.A. Elameen et al.

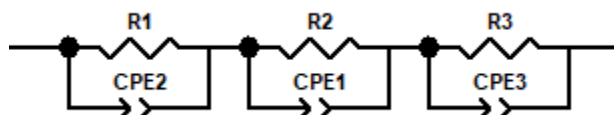

**Figure S1.** Electrochemical equivalent circuit used for fit an impedance spectra.

**Comment:** The C1, C2 and C3 parameters, listed in Tables S1-5 were calculated based on the CPE parameter obtained as a result of the fit. The used formula was:

$$C = ((CPE)^{\frac{1}{n}} R^{n-1}) \frac{L}{S} \quad (1)$$

where *CPE* is a constant phase element capacitance from fit, *n* is an admittance factor, *L* denotes a sample thickness, *S* is an area of electrode.

**Table S1.** Parameters of the electrochemical equivalent system obtained as a result of fitting of

| SAMPLE A7NbO <sub>4</sub> – DRY AIR |                                       |                                     |                                     |                                     |                                          |                                         |                                          |
|-------------------------------------|---------------------------------------|-------------------------------------|-------------------------------------|-------------------------------------|------------------------------------------|-----------------------------------------|------------------------------------------|
| T (°C)                              | R <sub>TOT</sub> (x10 <sup>5</sup> Ω) | R <sub>1</sub> (x10 <sup>5</sup> Ω) | R <sub>2</sub> (x10 <sup>5</sup> Ω) | R <sub>3</sub> (x10 <sup>5</sup> Ω) | C <sub>1</sub> (x10 <sup>-11</sup> F/cm) | C <sub>2</sub> (x10 <sup>-9</sup> F/cm) | C <sub>3</sub> (x10 <sup>-11</sup> F/cm) |
| 800                                 | 4.41                                  | 1.58                                | 1.05                                | 1.79                                | 3.21                                     | 1.25                                    | 1.02                                     |
| 750                                 | 8.32                                  | 2.14                                | 1.95                                | 4.24                                | 6.28                                     | 1.55                                    | 0.92                                     |
| 700                                 | 1.79                                  | 4.98                                | 3.92                                | 8.98                                | 6.03                                     | 1.23                                    | 0.92                                     |
| 650                                 | 39.8                                  | 15.4                                | 10.7                                | 13.7                                | 2.86                                     | 0.63                                    | 1.11                                     |
| 600                                 | 97.7                                  | 23.6                                | 26.8                                | 47.3                                | 6.85                                     | 0.76                                    | 0.96                                     |

impedance spectra for sample A7NbO<sub>4</sub> measured in dry air.

**Table S2.** Parameters of the electrochemical equivalent system obtained as a result of fitting of impedance spectra for sample A7NbO<sub>4</sub> measured in wet air.

| SAMPLE A7NbO <sub>4</sub> – WET AIR |                                       |                                     |                                     |                                     |                                          |                                         |                                          |
|-------------------------------------|---------------------------------------|-------------------------------------|-------------------------------------|-------------------------------------|------------------------------------------|-----------------------------------------|------------------------------------------|
| T (°C)                              | R <sub>TOT</sub> (x10 <sup>5</sup> Ω) | R <sub>1</sub> (x10 <sup>5</sup> Ω) | R <sub>2</sub> (x10 <sup>5</sup> Ω) | R <sub>3</sub> (x10 <sup>5</sup> Ω) | C <sub>1</sub> (x10 <sup>-12</sup> F/cm) | C <sub>2</sub> (x10 <sup>-9</sup> F/cm) | C <sub>3</sub> (x10 <sup>-10</sup> F/cm) |
| 800                                 | 2.40                                  | 1.56                                | 4.72                                | 0.38                                | 7.97                                     | 9.40                                    | 2.12                                     |

|     |      |      |       |      |      |      |      |
|-----|------|------|-------|------|------|------|------|
| 750 | 3.81 | 2.49 | 0.716 | 0.61 | 7.96 | 6.49 | 1.97 |
| 700 | 6.48 | 4.02 | 1.26  | 1.20 | 8.17 | 3.23 | 1.06 |
| 650 | 11.5 | 2.65 | 2.44  | 6.41 | 14.6 | 1.47 | 14.9 |

**Table S3.** Parameters of the electrochemical equivalent system obtained as a result of fitting of impedance spectra for sample A6NbO4 measured in dry air.

| SAMPLE A6NbO4 – DRY AIR |                                       |                                     |                                     |                                     |                                         |                                          |                                          |
|-------------------------|---------------------------------------|-------------------------------------|-------------------------------------|-------------------------------------|-----------------------------------------|------------------------------------------|------------------------------------------|
| T (°C)                  | R <sub>TOT</sub> (x10 <sup>5</sup> Ω) | R <sub>1</sub> (x10 <sup>5</sup> Ω) | R <sub>2</sub> (x10 <sup>5</sup> Ω) | R <sub>3</sub> (x10 <sup>5</sup> Ω) | C <sub>1</sub> (x10 <sup>-9</sup> F/cm) | C <sub>2</sub> (x10 <sup>-12</sup> F/cm) | C <sub>3</sub> (x10 <sup>-11</sup> F/cm) |
| 800                     | 2.87                                  | 0.762                               | 1.30                                | 0.808                               | 1.75                                    | 7.75                                     | 3.85                                     |
| 750                     | 6.39                                  | 1.60                                | 2.94                                | 1.85                                | 1.29                                    | 7.54                                     | 4.11                                     |
| 700                     | 14.2                                  | 3.50                                | 5.81                                | 4.86                                | 0.93                                    | 7.90                                     | 3.22                                     |
| 650                     | 38.3                                  | 10.5                                | 16.5                                | 11.3                                | 0.49                                    | 8.36                                     | 3.95                                     |

**Table S4.** Parameters of the electrochemical equivalent system obtained as a result of fitting of impedance spectra for sample A6NbO4 measured in wet air.

| SAMPLE A6NbO4 – WET AIR |                                       |                                     |                                     |                                     |                                         |                                         |                                          |
|-------------------------|---------------------------------------|-------------------------------------|-------------------------------------|-------------------------------------|-----------------------------------------|-----------------------------------------|------------------------------------------|
| T (°C)                  | R <sub>TOT</sub> (x10 <sup>5</sup> Ω) | R <sub>1</sub> (x10 <sup>5</sup> Ω) | R <sub>2</sub> (x10 <sup>5</sup> Ω) | R <sub>3</sub> (x10 <sup>5</sup> Ω) | C <sub>1</sub> (x10 <sup>-9</sup> F/cm) | C <sub>2</sub> (x10 <sup>-9</sup> F/cm) | C <sub>3</sub> (x10 <sup>-11</sup> F/cm) |
| 800                     | 1.89                                  | 3.93                                | 1.21                                | 0.29                                | 5.53                                    | 6.72                                    | 15.9                                     |
| 750                     | 3.03                                  | 7.32                                | 1.75                                | 0.54                                | 3.46                                    | 6.97                                    | 9.23                                     |
| 700                     | 5.10                                  | 1.05                                | 3.20                                | 0.85                                | 3.43                                    | 6.83                                    | 1.21                                     |
| 650                     | 8.62                                  | 1.92                                | 3.77                                | 2.94                                | 1.54                                    | 8.34                                    | 2.63                                     |
| 600                     | 15.0                                  | 3.27                                | 5.42                                | 6.27                                | 1.23                                    | 10.4                                    | 1.79                                     |

**Table S5.** Parameters of the electrochemical equivalent system obtained as a result of fitting of impedance spectra for sample A5NbO4 measured in dry air.

| SAMPLE A5NbO4 – DRY AIR |                                       |                                     |                                     |                                     |                                          |                                         |                                          |
|-------------------------|---------------------------------------|-------------------------------------|-------------------------------------|-------------------------------------|------------------------------------------|-----------------------------------------|------------------------------------------|
| T (°C)                  | R <sub>TOT</sub> (x10 <sup>5</sup> Ω) | R <sub>1</sub> (x10 <sup>5</sup> Ω) | R <sub>2</sub> (x10 <sup>5</sup> Ω) | R <sub>3</sub> (x10 <sup>5</sup> Ω) | C <sub>1</sub> (x10 <sup>-10</sup> F/cm) | C <sub>2</sub> (x10 <sup>-9</sup> F/cm) | C <sub>3</sub> (x10 <sup>-11</sup> F/cm) |
| 800                     | 2.54                                  | 0.513                               | 0.45                                | 1.58                                | 10.9                                     | 1.32                                    | 1.83                                     |
| 750                     | 5.50                                  | 1.27                                | 1.04                                | 3.19                                | 5.69                                     | 1.43                                    | 1.84                                     |
| 700                     | 12.30                                 | 3.10                                | 2.07                                | 7.11                                | 3.73                                     | 1.44                                    | 1.74                                     |
| 650                     | 28.90                                 | 9.88                                | 3.73                                | 15.30                               | 1.57                                     | 1.83                                    | 1.64                                     |
| 600                     | 80.40                                 | 23.90                               | 17.90                               | 38.60                               | 2.04                                     | 1.47                                    | 2.27                                     |

**Table S6.** Parameters of the electrochemical equivalent system obtained as a result of fitting of impedance spectra for sample A5NbO4 measured in wet air.

| <b>SAMPLE A5NbO4 – WET AIR</b> |                                                |                                              |                                              |                                              |                                                   |                                                  |                                                   |
|--------------------------------|------------------------------------------------|----------------------------------------------|----------------------------------------------|----------------------------------------------|---------------------------------------------------|--------------------------------------------------|---------------------------------------------------|
| <b>T<br/>(°C)</b>              | <b>R<sub>TOT</sub><br/>(x10<sup>5</sup> Ω)</b> | <b>R<sub>1</sub><br/>(x10<sup>5</sup> Ω)</b> | <b>R<sub>2</sub><br/>(x10<sup>5</sup> Ω)</b> | <b>R<sub>3</sub><br/>(x10<sup>5</sup> Ω)</b> | <b>C<sub>1</sub><br/>(x10<sup>-10</sup> F/cm)</b> | <b>C<sub>2</sub><br/>(x10<sup>-9</sup> F/cm)</b> | <b>C<sub>3</sub><br/>(x10<sup>-11</sup> F/cm)</b> |
| 800                            | 1.86                                           | 0.28                                         | 0.60                                         | 0.97                                         | 32.5                                              | 1.48                                             | 2.72                                              |
| 750                            | 3.34                                           | 0.61                                         | 0.73                                         | 2.00                                         | 9.72                                              | 1.69                                             | 2.01                                              |
| 700                            | 5.72                                           | 1.29                                         | 0.839                                        | 3.59                                         | 4.30                                              | 1.93                                             | 1.66                                              |
| 650                            | 9.29                                           | 2.82                                         | 1.09                                         | 5.39                                         | 1.18                                              | 1.98                                             | 1.45                                              |
| 600                            | 19.3                                           | 3.48                                         | 3.08                                         | 12.7                                         | 7.01                                              | 2.00                                             | 1.64                                              |
